# Supplementary material for: Selectivity of Oxygen Evolution Reaction on Carbon Cloth-Supported δ-MnO2 Nanosheets in Electrolysis of Real Seawater
Source: MDPI journal article supplement (doi:10.3390/molecules28020854), 2023-01-14
Supplement: s1 [file s1]

**Selectivity of oxygen evolution reaction on carbon cloth - supported  $\delta$ -MnO<sub>2</sub>  
nanosheets in electrolysis of real seawater**

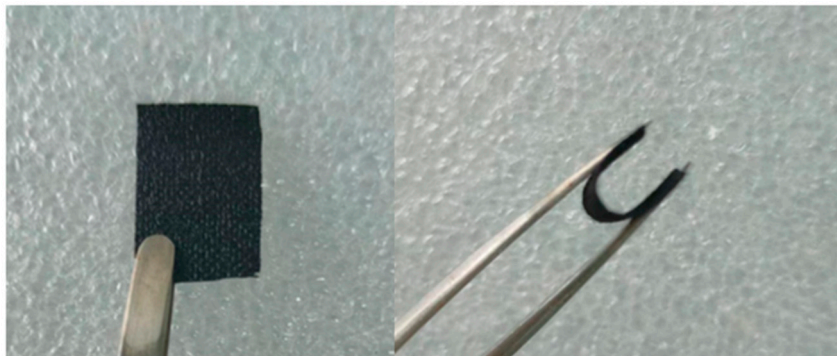

**Figure S1.** MnO<sub>2</sub>/CC

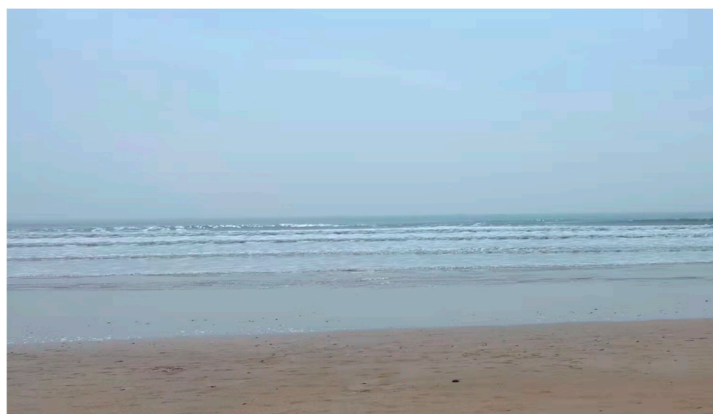

**Figure S2.** Real seawater collection site

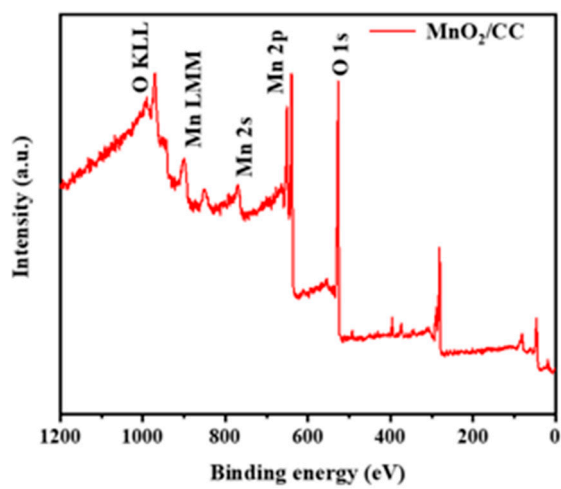

**Figure S3.** XPS full spectra of MnO<sub>2</sub>/CC

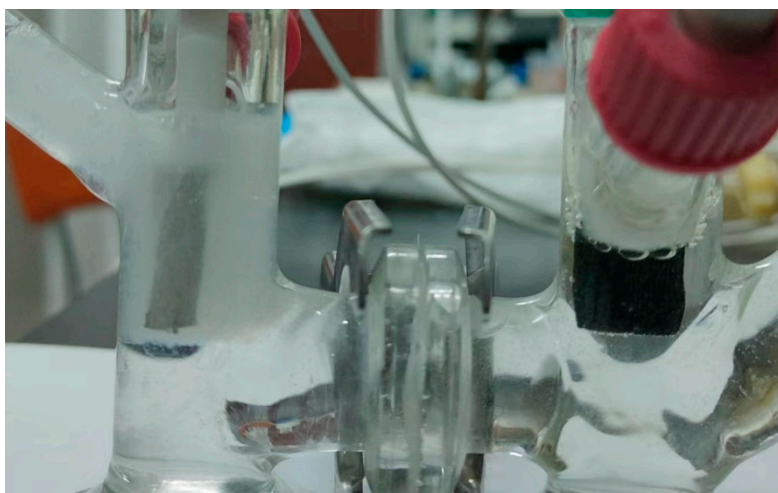

**Figure S4.** White precipitates are produced at the cathode during electrolysis of seawater

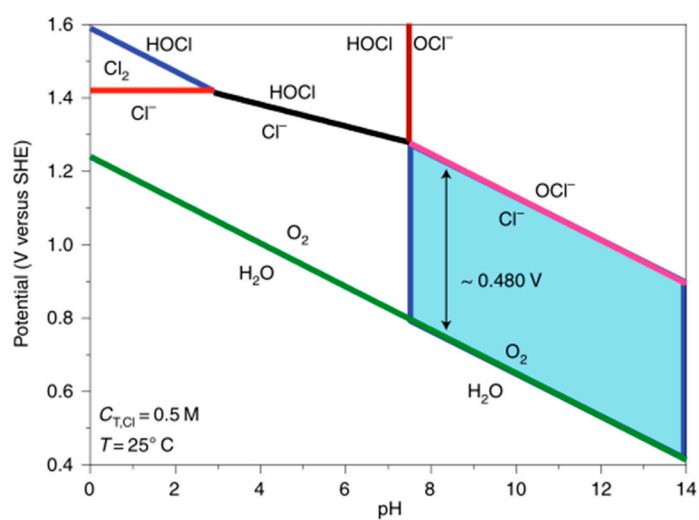

**Figure S5.** The Pourbaix diagram of an aqueous saline electrolyte [36].

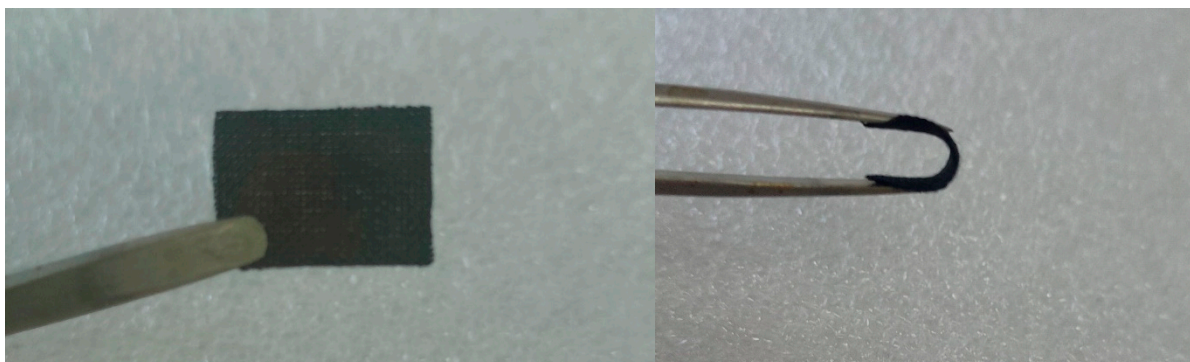

**Figure S6.** Constant current electrolysis experiment at the end of MnO<sub>2</sub>/CC

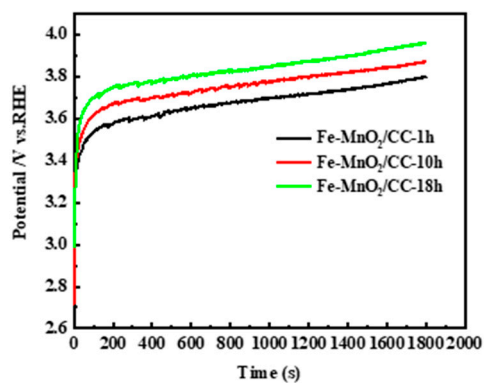

**Figure S7.** V-t curve of Fe-MnO<sub>2</sub>/CC sample with intercalation time of 1h, 10h and 18h at constant current of 100 mA.

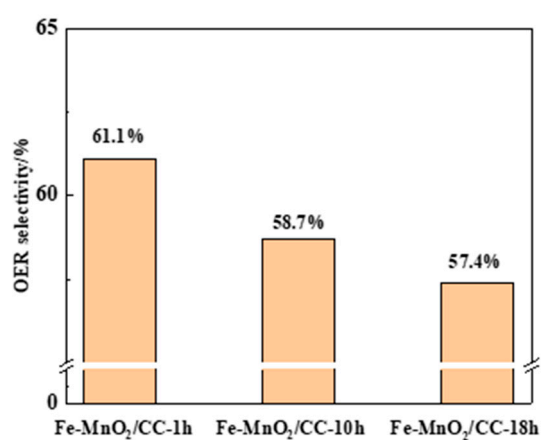

**Figure S8.** Fe-MnO<sub>2</sub>/CC oxygen evolution selectivity histogram at different intercalation times

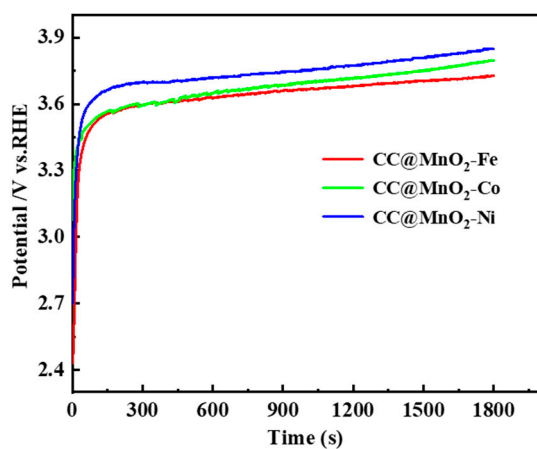

**Figure S9.** V-t curves of Fe-MnO<sub>2</sub>/CC, Co-MnO<sub>2</sub>/CC, Ni-MnO<sub>2</sub>/CC samples at constant current of 100 mA.

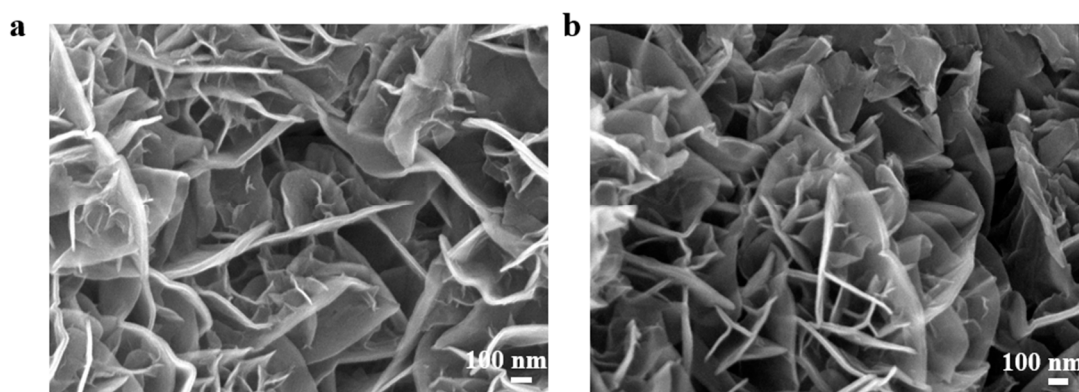

**Figure S10.** (a) SEM image of MnO<sub>2</sub>/CC after electrochemical test; (b) SEM image of Fe-MnO<sub>2</sub>/CC after electrochemical test.

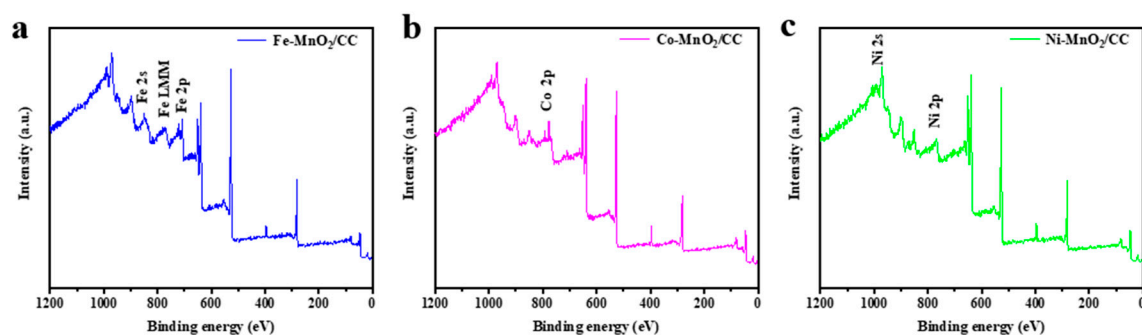

**Figure S11.** (a) XPS full spectra of Fe-MnO<sub>2</sub>/CC; (b) XPS full spectra of Co-MnO<sub>2</sub>/CC; (c) XPS full spectra of Ni-MnO<sub>2</sub>/CC.

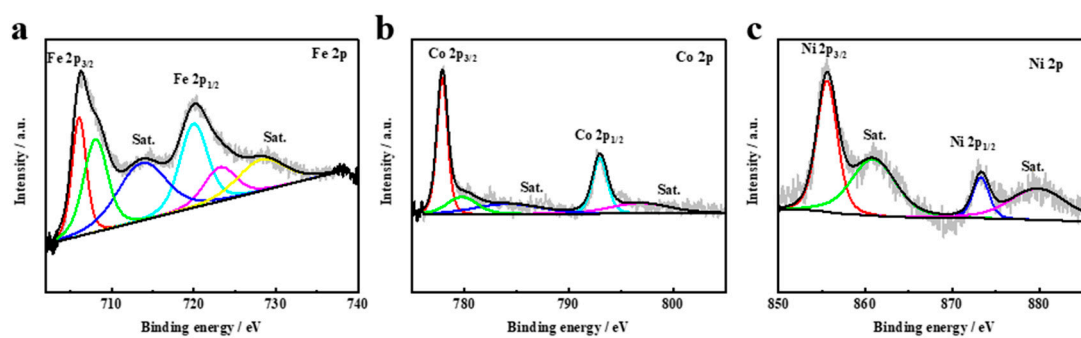

**Figure S12.** (a) High resolution Fe 2p XPS spectra of Fe-MnO<sub>2</sub>/CC; (b) High resolution Co 2p XPS spectra of Co-MnO<sub>2</sub>/CC; (c) High resolution Ni 2p XPS spectra of Ni-MnO<sub>2</sub>/CC.

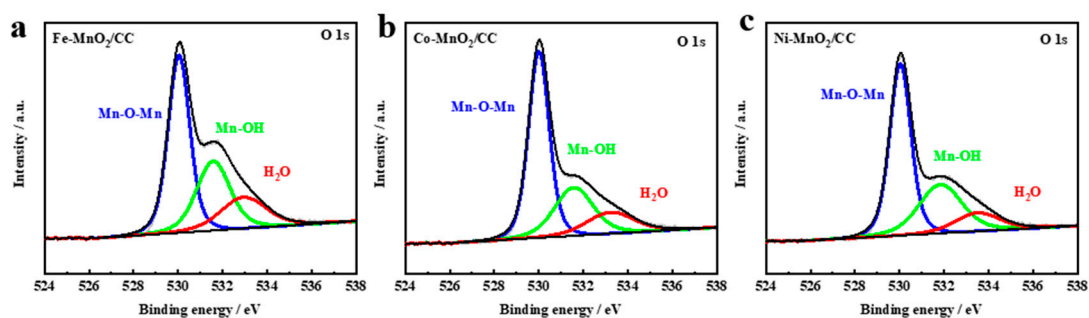

**Figure S13.** (a)High resolution O 1s XPS spectra of Fe-MnO<sub>2</sub>/CC; (b) High resolution O 1s XPS spectra of Co-MnO<sub>2</sub>/CC; (c)High resolution O 1s XPS spectra of Ni-MnO<sub>2</sub>/CC.

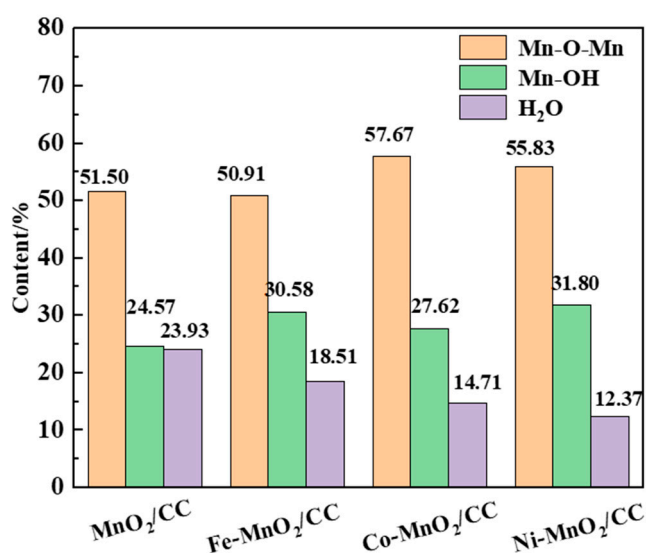

**Figure S14.** The contents of Mn-O-Mn, Mn-OH and H<sub>2</sub>O in MnO<sub>2</sub>/CC, Fe-MnO<sub>2</sub>/CC, Co-MnO<sub>2</sub>/CC and Ni-MnO<sub>2</sub>/CC

**Table S1.** Binding energy corresponding to Mn(III), Mn(IV) peak positions in MnO<sub>2</sub>/CC Mn2P high-resolution XPS spectra.

| species | Binding energy(eV)   |                      |
|---------|----------------------|----------------------|
|         | Mn 2p <sub>3/2</sub> | Mn 2p <sub>1/2</sub> |
| +3      | 641.86               | 653.57               |
| +4      | 643.14               | 654.82               |

**Table S2.** Binding energy corresponding to Mn(III), Mn(IV) peak positions in Fe-MnO<sub>2</sub>/CC, Co-MnO<sub>2</sub>/CC and Ni-MnO<sub>2</sub>/CC Mn2P high-resolution XPS spectra.

| Sample                  | species | Binding energy(eV)   |                      |
|-------------------------|---------|----------------------|----------------------|
|                         |         | Mn 2p <sub>3/2</sub> | Mn 2p <sub>1/2</sub> |
| Fe-MnO <sub>2</sub> /CC | +3      | 642.19               | 653.68               |
|                         | +4      | 643.16               | 655.06               |
| Co-MnO <sub>2</sub> /CC | +3      | 642.08               | 653.84               |
|                         | +4      | 643.38               | 654.91               |
| Ni-MnO <sub>2</sub> /CC | +3      | 642.15               | 653.74               |
|                         | +4      | 643.70               | 655.04               |

**Table S3.** Titration results of solution in tail gas absorption zone after constant current electrolytic seawater test. (Fe-MnO<sub>2</sub>/CC-1h)

|                                                        | 1        | 2     | 3     |
|--------------------------------------------------------|----------|-------|-------|
| Electrolyte volume/mL                                  | 10       |       |       |
| KI volume /mL                                          | 15       |       |       |
| Initial reading /mL                                    | 37.70    | 32.70 | 34.70 |
| End reading /mL                                        | 45.50    | 40.70 | 42.30 |
| Average of Na <sub>2</sub> SO <sub>3</sub> consumed/mL | 7.80     |       |       |
| nCl <sub>2</sub> /mol                                  | 0.000156 |       |       |
| Total battery /C                                       | 180      |       |       |
| Cl <sup>-</sup> Oxidation power /C                     | 30.1     |       |       |

**Table S4.** Titration results of anodic solution after constant current electrolytic seawater test. (Fe-MnO<sub>2</sub>/CC-1h)

|                                                       | 1        | 2     | 3     |
|-------------------------------------------------------|----------|-------|-------|
| NaOH volume/mL                                        | 10       |       |       |
| KI volume /mL                                         | 15       |       |       |
| Initial reading /mL                                   | 23.80    | 18.90 | 21.00 |
| End reading /mL                                       | 37.70    | 32.70 | 34.70 |
| Average of Na <sub>2</sub> SO <sub>3</sub> Consume/mL | 13.80    |       |       |
| nCl <sub>2</sub> /mol                                 | 0.000276 |       |       |
| Total battery /C                                      | 180      |       |       |
| Cl <sup>-</sup> Oxidation power /C                    | 39.9     |       |       |
| Total Cl <sup>-</sup> oxidation power/C               | 70.00    |       |       |
| Cl <sup>-</sup> Oxidation ratio /%                    | 38.89    |       |       |
| OER selectivity/%                                     | 61.11    |       |       |

**Table S5.** Titration results of solution in tail gas absorption zone after constant current electrolytic seawater test. (Fe-MnO<sub>2</sub>/CC-10h)

|                                                        | 1       | 2     | 3     |
|--------------------------------------------------------|---------|-------|-------|
| Electrolyte volume/mL                                  | 10      |       |       |
| KI volume /mL                                          | 15      |       |       |
| Initial reading /mL                                    | 34.00   | 31.10 | 33.70 |
| End reading /mL                                        | 42.00   | 39.20 | 41.60 |
| Average of Na <sub>2</sub> SO <sub>3</sub> consumed/mL | 8.00    |       |       |
| nCl <sub>2</sub> /mol                                  | 0.00016 |       |       |
| Total battery /C                                       | 180     |       |       |
| Cl <sup>-</sup> Oxidation power /C                     | 30.9    |       |       |

**Table S6.** Titration results of anodic solution after constant current electrolytic seawater test. (Fe-MnO<sub>2</sub>/CC-10 h)

|                                                       | 1     | 2     | 3     |
|-------------------------------------------------------|-------|-------|-------|
| NaOH volume/mL                                        | 10    |       |       |
| KI volume /mL                                         | 15    |       |       |
| Initial reading /mL                                   | 18.90 | 16.20 | 18.70 |
| End reading /mL                                       | 34.0  | 31.10 | 33.70 |
| Average of Na <sub>2</sub> SO <sub>3</sub> Consume/mL | 15.00 |       |       |
| nCl <sub>2</sub> /mol                                 | 0.003 |       |       |
| Total battery /C                                      | 180   |       |       |
| Cl <sup>-</sup> Oxidation power /C                    | 43.4  |       |       |
| Total Cl <sup>-</sup> oxidation power/C               | 74.3  |       |       |
| Cl <sup>-</sup> Oxidation ratio /%                    | 41.28 |       |       |
| OER selectivity/%                                     | 58.72 |       |       |

**Table S7.** Titration results of solution in tail gas absorption zone after constant current electrolytic seawater test. (Fe-MnO<sub>2</sub>/CC-18h)

|                                                        | 1        | 2     | 3     |
|--------------------------------------------------------|----------|-------|-------|
| Electrolyte volume/mL                                  | 10       |       |       |
| KI volume /mL                                          | 15       |       |       |
| Initial reading /mL                                    | 39.80    | 36.40 | 35.50 |
| End reading /mL                                        | 46.80    | 43.30 | 42.30 |
| Average of Na <sub>2</sub> SO <sub>3</sub> consumed/mL | 6.90     |       |       |
| nCl <sub>2</sub> /mol                                  | 0.000138 |       |       |
| Total battery /C                                       | 180      |       |       |
| Cl <sup>-</sup> Oxidation power /C                     | 26.6     |       |       |

**Table S8.** Titration results of anodic solution after constant current electrolytic seawater test. (Fe-MnO<sub>2</sub>/CC -18h)

|                                                       | 1       | 2     | 3     |
|-------------------------------------------------------|---------|-------|-------|
| NaOH volume/mL                                        | 10      |       |       |
| KI volume /mL                                         | 15      |       |       |
| Initial reading /mL                                   | 22.50   | 19.00 | 18.30 |
| End reading /mL                                       | 39.80   | 36.40 | 35.50 |
| Average of Na <sub>2</sub> SO <sub>3</sub> Consume/mL | 17.30   |       |       |
| nCl <sub>2</sub> /mol                                 | 0.00346 |       |       |
| Total battery /C                                      | 180     |       |       |
| Cl <sup>-</sup> Oxidation power /C                    | 50.0    |       |       |
| Total Cl <sup>-</sup> oxidation power/C               | 76.6    |       |       |
| Cl <sup>-</sup> Oxidation ratio /%                    | 42.56   |       |       |
| OER selectivity/%                                     | 57.44   |       |       |



**Table S9.** Titration results of solution in tail gas absorption zone after constant current electrolytic seawater test. (MnO<sub>2</sub>/CC)

|                                                        | 1       | 2     | 3     |
|--------------------------------------------------------|---------|-------|-------|
| Electrolyte volume/mL                                  | 10      |       |       |
| KI volume /mL                                          | 15      |       |       |
| Initial reading /mL                                    | 36.90   | 35.20 | 36.10 |
| End reading /mL                                        | 43.50   | 41.70 | 42.50 |
| Average of Na <sub>2</sub> SO <sub>3</sub> consumed/mL | 6.50    |       |       |
| nCl <sub>2</sub> /mol                                  | 0.00013 |       |       |
| Total battery /C                                       | 180     |       |       |
| Cl <sup>-</sup> Oxidation power /C                     | 25.0    |       |       |

**Table S10.** Titration results of anodic solution after constant current electrolytic seawater test. (MnO<sub>2</sub>/CC)

|                                                       | 1        | 2     | 3     |
|-------------------------------------------------------|----------|-------|-------|
| NaOH volume/mL                                        | 10       |       |       |
| KI volume /mL                                         | 15       |       |       |
| Initial reading /mL                                   | 24.80    | 22.70 | 23.80 |
| End reading /mL                                       | 36.90    | 35.20 | 36.10 |
| Average of Na <sub>2</sub> SO <sub>3</sub> Consume/mL | 12.30    |       |       |
| nCl <sub>2</sub> /mol                                 | 0.000276 |       |       |
| Total battery /C                                      | 180      |       |       |
| Cl <sup>-</sup> Oxidation power /C                    | 35.6     |       |       |
| Total Cl <sup>-</sup> oxidation power/C               | 60.6     |       |       |
| Cl <sup>-</sup> Oxidation ratio /%                    | 33.67    |       |       |
| OER selectivity/%                                     | 66.333   |       |       |

**Table S11.** Titration results of solution in tail gas absorption zone after constant current electrolytic seawater test. (Co-MnO<sub>2</sub>/CC-1h)

|                                                        | 1        | 2     | 3     |
|--------------------------------------------------------|----------|-------|-------|
| Electrolyte volume/mL                                  | 10       |       |       |
| KI volume /mL                                          | 15       |       |       |
| Initial reading /mL                                    | 34.50    | 35.40 | 34.80 |
| End reading /mL                                        | 42.40    | 43.70 | 42.90 |
| Average of Na <sub>2</sub> SO <sub>3</sub> consumed/mL | 8.10     |       |       |
| nCl <sub>2</sub> /mol                                  | 0.000162 |       |       |
| Total battery /C                                       | 180      |       |       |
| Cl <sup>-</sup> Oxidation power /C                     | 31.4     |       |       |

**Table S12.** Titration results of anodic solution after constant current electrolytic seawater test. (Co-MnO<sub>2</sub>/CC-1h)

|                                                       | 1        | 2     | 3     |
|-------------------------------------------------------|----------|-------|-------|
| NaOH volume/mL                                        | 10       |       |       |
| KI volume /mL                                         | 15       |       |       |
| Initial reading /mL                                   | 20.10    | 21.20 | 20.50 |
| End reading /mL                                       | 34.50    | 35.40 | 34.80 |
| Average of Na <sub>2</sub> SO <sub>3</sub> Consume/mL | 14.30    |       |       |
| nCl <sub>2</sub> /mol                                 | 0.000286 |       |       |
| Total battery /C                                      | 180      |       |       |
| Cl <sup>-</sup> Oxidation power /C                    | 42.2     |       |       |
| Total Cl <sup>-</sup> oxidation power/C               | 73.6     |       |       |
| Cl <sup>-</sup> Oxidation ratio /%                    | 40.90    |       |       |
| OER selectivity/%                                     | 59.10    |       |       |

**Table S13.** Titration results of solution in tail gas absorption zone after constant current electrolytic seawater test. (Ni-MnO<sub>2</sub>/CC-1h)

|                                                        | 1        | 2     | 3     |
|--------------------------------------------------------|----------|-------|-------|
| Electrolyte volume/mL                                  | 10       |       |       |
| KI volume /mL                                          | 15       |       |       |
| Initial reading /mL                                    | 33.30    | 34.40 | 39.70 |
| End reading /mL                                        | 39.50    | 40.80 | 46.30 |
| Average of Na <sub>2</sub> SO <sub>3</sub> consumed/mL | 6.40     |       |       |
| nCl <sub>2</sub> /mol                                  | 0.000128 |       |       |
| Total battery /C                                       | 180      |       |       |
| Cl <sup>-</sup> Oxidation power /C                     | 24.7     |       |       |

**Table S14.** Titration results of anodic solution after constant current electrolytic seawater test. (Ni-MnO<sub>2</sub>/CC -1h)

|                                                       | 1        | 2     | 3     |
|-------------------------------------------------------|----------|-------|-------|
| NaOH volume/mL                                        | 10       |       |       |
| KI volume /mL                                         | 15       |       |       |
| Initial reading /mL                                   | 19.50    | 20.60 | 25.90 |
| End reading /mL                                       | 33.30    | 34.40 | 39.70 |
| Average of Na <sub>2</sub> SO <sub>3</sub> Consume/mL | 13.80    |       |       |
| nCl <sub>2</sub> /mol                                 | 0.000276 |       |       |
| Total battery /C                                      | 180      |       |       |
| Cl <sup>-</sup> Oxidation power /C                    | 40.1     |       |       |
| Total Cl <sup>-</sup> oxidation power/C               | 64.8     |       |       |
| Cl <sup>-</sup> Oxidation ratio /%                    | 36.00    |       |       |
| OER selectivity/%                                     | 64.00    |       |       |
